# Supplementary material for: Medical overuse in the Iranian healthcare system: a systematic review protocol
Source: PubMed Central journal article supplement — BMJ Open. 2018 Apr 17;8(4):e020355. doi: 10.1136/bmjopen-2017-020355 (PMC5905767; doi:10.1136/bmjopen-2017-020355), 2018-04-17
Supplement: bmjopen-2017-020355.draft_revisions.pdf [file bmjopen-2017-020355.draft_revisions.pdf]

# BMJ Open

BMJ Open is committed to open peer review. As part of this commitment we make the peer review history of every article we publish publicly available.

When an article is published we post the peer reviewers' comments and the authors' responses online. We also post the versions of the paper that were used during peer review. These are the versions that the peer review comments apply to.

The versions of the paper that follow are the versions that were submitted during the peer review process. They are not the versions of record or the final published versions. They should not be cited or distributed as the published version of this manuscript.

BMJ Open is an open access journal and the full, final, typeset and author-corrected version of record of the manuscript is available on our site with no access controls, subscription charges or pay-per-view fees (<http://bmjopen.bmj.com>).

If you have any questions on BMJ Open's open peer review process please email [info.bmjopen@bmj.com](mailto:info.bmjopen@bmj.com)

# BMJ Open

## Medical overuse in the Iranian health care system: a systematic review protocol

|                               |                                                                                                                                                      |
|-------------------------------|------------------------------------------------------------------------------------------------------------------------------------------------------|
| Journal:                      | <i>BMJ Open</i>                                                                                                                                      |
| Manuscript ID                 | bmjopen-2017-020355                                                                                                                                  |
| Article Type:                 | Protocol                                                                                                                                             |
| Date Submitted by the Author: | 29-Oct-2017                                                                                                                                          |
| Complete List of Authors:     | Janati, Ali<br>Pezeshki, Mohammad Zakaria<br>Khodayari-Zarnagh, Rahim<br>Arab-Zozani, Morteza                                                        |
| Keywords:                     | Overuse, Health care system, Medical services, Health policy < HEALTH SERVICES ADMINISTRATION & MANAGEMENT, GENERAL MEDICINE (see Internal Medicine) |
|                               |                                                                                                                                                      |

SCHOLARONE™  
Manuscripts

Peer Review Only

## Medical overuse in the Iranian health care system: a systematic review protocol

Ali Janati<sup>1</sup>, Mohammad Zakaria Pezeshki<sup>2</sup>, Rahim Khodayari-Zarnagh<sup>3</sup>, Morteza Arab-Zozani<sup>4\*</sup>

### Authors' Affiliations

1. Iranian Center of Excellence in Health Management, School of Management and Medical Informatics, Tabriz University of Medical Sciences, Tabriz, Iran.
2. Department of Community Medicine, Faculty of Medicine, Tabriz University of Medical Sciences, Tabriz, Iran. Email; zakaria.pezeshki@gmail.com
3. Iranian Center of Excellence in Health Management, School of Management and Medical Informatics, Tabriz University of Medical Sciences, Tabriz, Iran. Email; rahimzarnagh@gmail.com
4. Iranian Center of Excellence in Health Management, School of Management and Medical Informatics, Tabriz University of Medical Sciences, Tabriz, Iran.

\*Corresponding author; Morteza Arab-Zozani

Address; Daneshgah Street, School of Management and Medical Informatics, Tabriz University of Medical Sciences, Tabriz, East Azerbaijan, Iran

Email; Email; [arab.hta@gmail.com](mailto:arab.hta@gmail.com)

Tell: +98 9153317843

## Abstract

**Introduction:** Lack of resources is one of the main problems of all health care systems. Recent studies have shown that reducing the overuse of medical services plays an important role in reducing health care system costs. Overuse of medical services is a major problem in the health care system, and leads to a decrease in the quality of care and increase of harms and costs in patients. So far, few studies have been conducted in this regard in Iran. The main objective of this systematic review is to perform an inclusive search for studies that report overuse of medical services in Iranian health care system.

**Method and analysis:** An extensive search of the literature will be conducted in six databases including PubMed, Embase, Scopus, web of science, Cochrane and SID using a comprehensive search strategy to identify studies on overuse of medical care by the end of 2017, completed by reference tracking, author tracking, and expert consultation. Any study that reports an overuse in a service based on a specific standard will be included in the study. Two reviewers will screen the articles based on the title, abstract, and full-text and extract data about type of service, clinical area, and overuse rate. Quality appraisal will be assessed using the JBI checklist. Potential

discrepancies will be resolved by consulting a third author.

**Dissemination:** Recommendations will be made to the Iranian MOHME (Ministry of Health and Medical Education) in order to make better evidence-based decisions about medical services in the future.

**Registration details:** PROSPERO  
CRD42017075481

**Keywords:** Overuse, Medical services, Health Care System, Iran

## Article summary

### Article focus

- To outline the plans of a systematic review aimed at identifying overuse of medical services in Iranian health care system.
- To highlight the areas in which the overuse of medical services will take place much more.

### Key messages

- The study will provide the first evidence about medical overuse in Iranian health care system.
- Based on the result of this study, overuse areas will be demonstrated to the Iranian MOHME in order to reduce the rate of medical services overuse.

### Strengths and limitations

- To our knowledge, the study will provide the first systematic review focused on overuse of medical services in Iranian health care system.
- This study could inform decision maker and physicians to distinguish the area of overuse in medical services and plan to reduce it.

- All stages of the study (screening, quality appraisal, data extraction) will be done by two researchers independently.

## Introduction

Medical overuse is often defined as the services that are more harm than benefit, does not seem to increase the quality and quantity of life, imposed excessive costs on the patient and the health care system, has low quality and if the patient has enough information, she/he will not ask for it.<sup>1-3</sup>

Based on the WHO Health Systems Framework,<sup>4</sup> overuse can delay access to four main goals of health systems-improved health, responsiveness, financial risk protection and efficiency-by increasing disadvantages and costs of medical services.<sup>5</sup> In a health system where overuse of medical services is prevalent<sup>6-8</sup> it certainly does not have a high quality health service,<sup>9</sup> because according to this framework a good health service is a service which deliver effective and safe with high quality and without waste of resources . Also, in such a system, the workforce does not function effectively because of the fear of legal follow-up.<sup>4</sup>

Over the past few years, there has been a lot of effort in identifying the overuse of medical services in the world.<sup>10-12</sup> Some of these initiatives include "Choosing Wisely", an initiative of the ABIM foundation, "Less Is More" series by

JAMA Internal Medicine, "Too Much Medicine" and "Overdiagnosis" series by BMJ.<sup>13 14</sup>

As with other countries in Iran, There is little information about the amount and drivers of medical overuse in health care system.<sup>15</sup> As well as, there is no study that thoroughly examines overuse of medical services. So, the identification of overuse in medical services helps patients, practitioners, researchers, administrator and decision-makers of the health care system to manage costs, disadvantages and benefits of services and ultimately balance the use of services.

The objectives are to (1) systematically review and identify literature on the overuse of medical services; (2) identify the areas in which the overuse of medical services will take place much more; and (3) determine the rate of overuse of medical services in the Iranian health care system.

## Methods

### Study method

We will conduct a systematic review in accordance with the Preferred Reporting Items for Systematic Reviews and Meta-analysis (PRISMA).<sup>16</sup>

The review protocol was registered in PROSPERO (registration

number: CRD42017075481;  
[http://www.crd.york.ac.uk/PROSPERO/display\\_record.php?ID=CRD42017075481](http://www.crd.york.ac.uk/PROSPERO/display_record.php?ID=CRD42017075481)).

### Eligibility criteria

All published studies that investigated the overuse of medical services will be included in the study. The included study will not limit based on the type. Our definition of overuse will be based on Saini et al. in recently Right Care Lancet series.<sup>1 3 11</sup> Only studies will be included that have addressed overuse in Iranian health care system. Studies will be limited in English and Farsi languages. Articles will be excluded if the researchers do not have access to the full-text.

### Search strategy and data sources

An extensive search of the literature will be conducted in six databases including PubMed, Embase, Scopus, web of science, Cochrane and SID using a comprehensive search strategy to identify studies on overuse of medical care by the end of 2017, completed by reference tracking, author tracking, and expert consultation. We use a combination of Medical Subject Headings (MeSH) terms and free term to maximize the specificity and feasibility of the search during the initial search.

Proposed search strategy (PubMed);

1. Medical overuse [MeSH Term]

2. Overuse ti,ab.
3. Overmedicalization ti,ab.
4. Overtreatment\* ti,ab.
5. Overdiagnos\* ti,ab.
6. Inappropriate care ti,ab.
7. Unnecessary ti,ab.
8. Overutilization ti,ab.
9. Medicalization\* ti,ab.
10. Overmedication ti,ab.
11. Misdiagnosis ti,ab.
12. "Unwanted care" ti,ab.
13. Polypharmacy ti,ab.
14. Overprescription ti,ab.
15. Value-based care ti,ab.
16. Right care ti,ab.
17. Delivery of Health Care [MeSH Term]
18. Health services [MeSH Term]
19. Medical services
20. Iran
21. 1 Or 2 Or 3 Or 4 Or 5 Or 6 Or 7 Or 8 Or 9 Or 10 Or 11 Or 12 Or 13 Or 14 Or 15 Or 16
22. 17 OR 18 OR 19
23. 20 AND 21 AND 22

### Study selection process and data extraction

After completing the search, the retrieved records will be imported into the EndNote software (version X8), and then the duplicate records will be deleted. Two independent reviewers will screen the articles based on the title, abstract, and full-text and extract data about authors, publication year, type of study, study population, type of service, clinical area, and overuse rate. All disagreements in

each level of study will be noted and resolved by consensus a third researcher.<sup>17</sup>

### Quality appraisal

Poor-quality studies can distort and affect the quality of the results.<sup>18</sup> Due to the possible wide range of included studies, we will use the JBI checklists according to the type of included studies.<sup>19</sup> Two researchers will independently appraise the quality of included studies. All potential discrepancies will be resolved through consultation with the third researcher.

### Data synthesis

We will categorize the results of the included studies based on publication year, clinical area, type of service (diagnostic tests, therapeutic procedures and medications) and range or rate of overuse. Where possible, meta-analysis will be done using quantitative data from individual studies. Also, we will report the services that have the largest number of overuse.

### Discussion

Like the rest of the world, there is little evidence about overuse of medical services in Iranian health care system.<sup>20</sup>

Reducing the overuse of medical services requires extensive studies at the national and regional levels. We are hopeful that this systematic review will provide useful

results in identifying overuse of medical services in Iranian health care system. We are hopeful that the result of this systematic review will make robust and valuable evidence for evidence informed policy making process. However, we note that we are still at the beginning of a long journey, and the need to conduct studies in this field is felt more than ever.

### Abbreviations

ABIM: American Board of Internal Medicine

SID: scientific information database

JBI: Joanna Briggs Institute

### Acknowledgements

This systematic review will form part of Morteza Arab-zozani' PhD dissertation, supervised by Dr Ali Janati, Dr Mohammad Zakaria Pezeshki and Dr Rahim Khodayari-zarnagh. This work was supported by Iranian Center of Excellence in Health Management (ICEHM), School of Management and Medical Informatics, Tabriz University of Medical Sciences, Tabriz, Iran.

### Funding

This study is under review to fund by Tabriz University of Medical Sciences.



## Contributors

MA and MP initiated and conceived the study. AJ and RKH participated in study design. MA drafted the research protocol. MP, AJ and RKH critically revised the content of the written protocol. All authors approved the final version of this protocol.

## Competing interests

No competing interests

## References

1. Elshaug AG, Rosenthal MB, Lavis JN, et al. Levers for addressing medical underuse and overuse: achieving high-value health care. *The Lancet* 2017
2. Korenstein D, Smith CD. A practical framework for understanding and reducing medical overuse: Conceptualizing overuse through the patient-clinician interaction. *Journal of hospital medicine* 2017;12(5)
3. Brownlee S, Chalkidou K, Doust J, et al. Evidence for overuse of medical services around the world. *The Lancet* 2017
4. World Health Organization. Monitoring the building blocks of health systems: a handbook of indicators and their measurement strategies: World Health Organization 2010.
5. Korenstein D, Falk R, Howell EA, et al. Overuse of health care services in the United States: an understudied problem. *Archives of internal medicine* 2012;172(2):171-78.
6. Brownlee S. Overtreated: Why too much medicine is making us sicker and poorer: Bloomsbury Publishing USA 2010.
7. Kale MS, Bishop TF, Federman AD, et al. Trends in the overuse of ambulatory health care services in the United States. *JAMA internal medicine* 2013;173(2):142-48.
8. Welch HG, Schwartz L, Woloshin S. Overdiagnosed: making people sick in the pursuit of health: Beacon Press 2011.
9. Berwick DM. Avoiding overuse—the next quality frontier. *The Lancet* 2017
10. Powell AA, Bloomfield HE, Burgess DJ, et al. A conceptual framework for understanding and reducing overuse by primary care providers. *Medical Care Research and Review* 2013;70(5):451-72.
11. Saini V, Brownlee S, Elshaug AG, et al. Addressing overuse and underuse around the world. *The Lancet* 2017
12. Morgan DJ, Brownlee S, Leppin AL, et al. Setting a research agenda for medical overuse. *The BMJ* 2015;351
13. Rosenberg A, Agiro A, Gottlieb M, et al. Early trends among seven recommendations from the Choosing Wisely campaign. *JAMA internal medicine* 2015;175(12):1913-20.
14. Rumball-Smith J, Shekelle PG, Bates DW. Using the Electronic Health Record to Understand and Minimize Overuse. *Jama* 2017;317(3):257-58.
15. Keyhani S, Falk R, Bishop T, et al. The relationship between geographic variations and overuse of healthcare services: a systematic review. *Medical care* 2012;50(3):257-61.
16. Shamseer L, Moher D, Clarke M, et al. Preferred reporting items for systematic review and meta-analysis protocols (PRISMA-P) 2015: elaboration and explanation. *Bmj* 2015;349:g7647.
17. Reviews UoYcf, Dissemination. Systematic reviews: CRD's guidance for undertaking reviews in health care: University of York, Centre for Reviews & Dissemination 2009.
18. Jones E, Taylor B, MacArthur C, et al. The effect of early postnatal discharge from hospital for women and infants:

- 1  
2  
3 a systematic review protocol.  
4 *Systematic reviews* 2016;5(1):24.
- 5 19. Porritt K, Gomersall J, Lockwood C. JBI's  
6 systematic reviews: study selection  
7 and critical appraisal. *AJN The*  
8 *American Journal of Nursing*  
9 2014;114(6):47-52.
- 10 20. Arab-Zozani M. a Policy Package for  
11 Preventing Overuse and Uderuse in  
12 Iranian Health System. *PhD*  
13 *Dissertation* 2017  
14  
15  
16  
17  
18  
19  
20  
21  
22  
23  
24  
25  
26  
27  
28  
29  
30  
31  
32  
33  
34  
35  
36  
37  
38  
39  
40  
41  
42  
43  
44  
45  
46  
47  
48  
49  
50  
51  
52  
53  
54  
55  
56  
57  
58  
59  
60

For peer review only

1  
2  
3  
4  
5  
6  
7  
8  
9  
10  
11  
12  
13  
14  
15  
16  
17  
18  
19  
20  
21  
22  
23  
24  
25  
26  
27  
28  
29  
30  
31  
32  
33  
34  
35  
36  
37  
38  
39  
40  
41  
42  
43  
44  
45  
46  
47

Systematic Review protocol. The effects of early postnatal discharge from hospital for healthy women and term infants

**PRISMA-P 2015 Checklist: recommended items to include in a systematic review protocol**

| Section and topic                 | Item Number | Checklist item                                                                                                                                                                                  | Page number(s)   |
|-----------------------------------|-------------|-------------------------------------------------------------------------------------------------------------------------------------------------------------------------------------------------|------------------|
| <b>ADMINISTRATIVE INFORMATION</b> |             |                                                                                                                                                                                                 |                  |
| Title:                            |             |                                                                                                                                                                                                 |                  |
| Identification                    | 1a          | Identify the report as a protocol of a systematic review                                                                                                                                        | 1                |
| Update                            | 1b          | If the protocol is for an update of a previous systematic review, identify as such                                                                                                              | Not an update    |
| Registration                      | 2           | If registered, provide the name of the register (such as PROSPERO) and registration number                                                                                                      | 2                |
| Authors:                          |             |                                                                                                                                                                                                 |                  |
| Contact                           | 3a          | Provide name, institutional affiliation, email address of all protocol authors; provide physical mailing address of corresponding author                                                        | 1                |
| Contributions                     | 3b          | Describe contributions of protocol authors and identify the guarantor of the review                                                                                                             | 7                |
| Amendments                        | 4           | If the protocol represents an amendment of a previously completed or published protocol, identify as such and list changes; otherwise, state plan for documenting important protocol amendments | Not an amendment |
| Support:                          |             |                                                                                                                                                                                                 |                  |
| Sources                           | 5a          | Indicate sources of financial or other support for the review                                                                                                                                   | 6                |
| Sponsor                           | 5b          | Provide name for the review funder and/or sponsor                                                                                                                                               | 6                |
| Role of sponsor or funder         | 5c          | Describe role of funder(s), sponsor(s), and/or institution(s), if any, in developing the protocol                                                                                               | 6                |
| <b>INTRODUCTION</b>               |             |                                                                                                                                                                                                 |                  |
| Rationale                         | 6           | Describe the rationale for the review in the context of what is already known                                                                                                                   | 4                |
| Objectives                        | 7           | Provide an explicit statement of the question(s) the review will address with reference to participants, interventions, comparators, and outcomes (PICO)                                        | 4                |
| <b>METHODS</b>                    |             |                                                                                                                                                                                                 |                  |

## Systematic Review protocol. The effects of early postnatal discharge from hospital for healthy women and term infants

|                                    |     |                                                                                                                                                                                                                               |     |
|------------------------------------|-----|-------------------------------------------------------------------------------------------------------------------------------------------------------------------------------------------------------------------------------|-----|
| Eligibility criteria               | 8   | Specify the study characteristics (such as PICO, study design, setting, time frame) and report characteristics (such as years considered, language, publication status) to be used as criteria for eligibility for the review | 5-6 |
| Information sources                | 9   | Describe all intended information sources (such as electronic databases, contact with study authors, trials registers or other grey literature sources) with planned dates of coverage                                        | 5-6 |
| Search strategy                    | 10  | Present draft of search strategy to be used for at least one electronic database, including planned limits, such that it could be repeated.                                                                                   | 5-6 |
| Study records:                     |     |                                                                                                                                                                                                                               |     |
| Data management                    | 11a | Describe the mechanism(s) that will be used to manage records and data throughout the review                                                                                                                                  | 5   |
| Selection process                  | 11b | State the process that will be used for selecting studies (such as two independent reviewers) through each phase of the review (that is, screening, eligibility and inclusion in meta-analysis)                               | 5   |
| Data collection process            | 11c | Describe planned method of extracting data from reports (such as piloting forms, done independently, in duplicate), any processes for obtaining and confirming data from investigators                                        | 5   |
| Data items                         | 12  | List and define all variables for which data will be sought (such as PICO items, funding source), any pre-planned data assumptions and simplifications                                                                        | 5   |
| Outcomes and prioritization        | 13  | List and define all outcomes for which data will be sought, including prioritization of main and additional outcomes, with rationale                                                                                          | 5   |
| Risk of bias in individual studies | 14  | Describe anticipated methods for assessing risk of bias of individual studies, including whether this will be done at the outcome or study level., or both; state how this information will be used in data synthesis         | 5   |
| Data synthesis                     | 15a | Describe criteria under which study data will be                                                                                                                                                                              | 5   |

1  
2  
3  
4  
5  
6  
7  
8  
9  
10  
11  
12  
13  
14  
15  
16  
17  
18  
19  
20  
21  
22  
23  
24  
25  
26  
27  
28  
29  
30  
31  
32  
33  
34  
35  
36  
37  
38  
39  
40  
41  
42  
43  
44  
45  
46  
47

Systematic Review protocol. The effects of early postnatal discharge from hospital for healthy women and term infants

|                                   |     |                                                                                                                                                                                                                                       |                |
|-----------------------------------|-----|---------------------------------------------------------------------------------------------------------------------------------------------------------------------------------------------------------------------------------------|----------------|
|                                   |     | quantitatively synthesised                                                                                                                                                                                                            |                |
|                                   | 15b | If data are appropriate for quantitative synthesis, describe planned summary measures, methods of handling data and methods of combining data from studies, including any planned exploration of consistency (such as I2, Kendall's ) | 5              |
|                                   | 15c | Describe any proposed additional analyses (such as sensitivity or subgroup analyses, meta-regression)                                                                                                                                 | 5              |
|                                   | 15d | If quantitative synthesis is not appropriate, describe the type of summary planned                                                                                                                                                    | Not applicable |
| Met-bias(es)                      | 16  | Specify any planned assessment of meta-bias(es) (such as publication bias across studies, selective reporting within studies)                                                                                                         | 5              |
| Confidence in cumulative evidence | 17  | Describe how the strength of the body of evidence will be assessed (such as GRADE)                                                                                                                                                    | 5              |

# BMJ Open

## Medical overuse in the Iranian health care system: a systematic review protocol

|                                 |                                                                                                                                                                                                                                                                                                                                                                                                                                                           |
|---------------------------------|-----------------------------------------------------------------------------------------------------------------------------------------------------------------------------------------------------------------------------------------------------------------------------------------------------------------------------------------------------------------------------------------------------------------------------------------------------------|
| Journal:                        | <i>BMJ Open</i>                                                                                                                                                                                                                                                                                                                                                                                                                                           |
| Manuscript ID                   | bmjopen-2017-020355.R1                                                                                                                                                                                                                                                                                                                                                                                                                                    |
| Article Type:                   | Protocol                                                                                                                                                                                                                                                                                                                                                                                                                                                  |
| Date Submitted by the Author:   | 25-Feb-2018                                                                                                                                                                                                                                                                                                                                                                                                                                               |
| Complete List of Authors:       | Arab-Zozani, Morteza; Tabriz University of Medical Sciences, School of Management and Medical Informatics<br>Pezeshki, Mohammad Zakaria; Tabriz University of Medical Sciences Faculty of Medicine, Department of Community Medicine<br>Khodayari-Zarnagh, Rahim; Tabriz University of Medical Sciences, School of Management and Medical Informatics<br>Janati, Ali; Tabriz University of Medical Sciences, School of Management and Medical Informatics |
| <b>Primary Subject Heading</b>: | Health policy                                                                                                                                                                                                                                                                                                                                                                                                                                             |
| Secondary Subject Heading:      | Evidence based practice, General practice / Family practice, Health services research                                                                                                                                                                                                                                                                                                                                                                     |
| Keywords:                       | Overuse, Health care system, Medical services, Health policy < HEALTH SERVICES ADMINISTRATION & MANAGEMENT, GENERAL MEDICINE (see Internal Medicine)                                                                                                                                                                                                                                                                                                      |
|                                 |                                                                                                                                                                                                                                                                                                                                                                                                                                                           |

SCHOLARONE™  
Manuscripts

## Medical overuse in the Iranian health care system: a systematic review protocol

Morteza Arab-Zozani<sup>1</sup>, Mohammad Zakaria Pezeshki<sup>2</sup>, Rahim Khodayari-Zarnagh<sup>3</sup>, Ali Janati<sup>4\*</sup>

### Authors' Affiliations

1. Iranian Center of Excellence in Health Management, Department of Health Services Management, School of Management and Medical Informatics, Tabriz University of Medical Sciences, Tabriz, Iran. Email; arab.hta@gmail.com
2. Department of Community Medicine, Faculty of Medicine, Tabriz University of Medical Sciences, Tabriz, Iran. Email; zakaria.pezeshki@gmail.com
3. Iranian Center of Excellence in Health Management, Department of Health Services Management, School of Management and Medical Informatics, Tabriz University of Medical Sciences, Tabriz, Iran. Email; rahimzarnagh@gmail.com
4. Iranian Center of Excellence in Health Management, Department of Health Services Management, School of Management and Medical Informatics, Tabriz University of Medical Sciences, Tabriz, Iran.

\*Corresponding author; Ali Janati

Address; Daneshgah Street, School of Management and Medical Informatics, Tabriz University of Medical Sciences, Tabriz, East Azerbaijan, Iran

Email; Email; janatali82@gmail.com

Tell: +98 9144195377

## Abstract

**Introduction:** Lack of resources is one of the main problems of all health care systems. Recent studies have shown that reducing the overuse of medical services plays an important role in reducing health care system costs. Overuse of medical services is a major problem in the health care system, and it threatens the quality of the services, can harm patients and create excess costs for patients. So far, few studies have been conducted in this regard in Iran. The main objective of this systematic review is to perform an inclusive search for studies that report overuse of medical services in Iranian health care system.

**Method and analysis:** An extensive search of the literature will be conducted in six databases including PubMed, Embase, Scopus, Web of Science, Cochrane and SID using a comprehensive search strategy to identify studies on overuse of medical care. The search will be done without time limit until the end of 2017, completed by reference tracking, author tracking, and expert consultation. The search will be conducted on February 1, 2018. Any study that reports an overuse in a service based on a specific standard will be included in the study. Two reviewers will screen the articles based on the title, abstract, and full-text and extract data about type of service, clinical area, and overuse rate. Quality appraisal will be assessed using the JBI checklist. Potential discrepancies will be resolved by consulting a third author.

**Ethics and Dissemination:** Recommendations will be made to the Iranian MOHME (Ministry of Health and Medical Education) in order to make better evidence-based decisions about medical services in the future.

**Registration details:** PROSPERO CRD42017075481

**Keywords:** Overuse, Medical services, Health Care System, Iran



## Article summary

### Strengths and limitations

- To our knowledge, the study will provide the first systematic review focused on overuse of medical services in Iranian health care system.
- This study could inform decision maker and physicians to distinguish the area of overuse in medical services and plan to reduce it.
- All stages of the study (screening, quality appraisal, data extraction) will be done by two researchers independently.
- The dispersion of studies in the field of overuse and the difficulty of classifying final studies is one of the possible constraints.

## Introduction

Medical overuse is often defined as the services that are more harm than benefit, does not seem to increase the quality and quantity of life, imposed excessive costs on the patient and the health care system, has low quality and if the patient has enough information, she/he will not ask for it.<sup>1-3</sup>

Based on the WHO Health Systems Framework,<sup>4</sup> overuse can delay access to four main goals of health systems- improved health, responsiveness, financial risk protection and efficiency- by increasing disadvantages and costs of medical services.<sup>5</sup> In a health system where overuse of medical services is prevalent<sup>6-8</sup> it probably does not have a high quality health service,<sup>9</sup> because according to this framework a good health service is a service which delivers effective and safe with high quality and without waste of resources.<sup>10</sup> Also, in such a system, the workforce does not function effectively because of the fear of legal follow-up.<sup>4</sup>

Over the past few years, there has been a lot of effort in identifying the overuse of medical services in the world.<sup>11-13</sup> Some of these initiatives include "Choosing Wisely", an initiative of the ABIM foundation, "Less Is More" series by JAMA Internal Medicine, "Too Much Medicine" and "Overdiagnosis" series by BMJ.<sup>14 15</sup>

As with other countries in Iran, there is little information about the amount and drivers of medical overuse in the health care system.<sup>16</sup> Also, there is no study that thoroughly examines overuse of medical services. So, the identification of overuse in medical services helps patients, practitioners, researchers, administrators and decision-makers of the health care system to manage costs, disadvantages and benefits of services and ultimately balance the use of services.

The objectives are to (1) systematically review and identify literature on the overuse of medical services; (2) identify the areas in which the overuse of medical services will take place; and (3) determine the rate of overuse of medical services in the Iranian health care system.

## Methods

### Study method

We will conduct a systematic review in accordance with the Preferred Reporting Items for Systematic Reviews and Meta-analysis (PRISMA).<sup>17 18</sup> We used the PRISMA protocol

1  
2  
3 because its use would reduce the risk of flawed reporting and increase the transparency and  
4 clarity of the systematic review reports.<sup>18</sup>  
5

6 The review protocol was registered in PROSPERO (registration number: CRD42017075481;  
7 [http://www.crd.york.ac.uk/PROSPERO/display\\_record.php?ID=CRD42017075481](http://www.crd.york.ac.uk/PROSPERO/display_record.php?ID=CRD42017075481)).  
8  
9

### 10 **Eligibility criteria**

11  
12 All published studies that investigated the overuse of medical services will be included in the  
13 study. The included studies will not limited based on study type. Our definition of overuse  
14 will be based on Saini et al. in the recent Right Care Lancet series ('Provision of a service that  
15 is unlikely to increase the quality or quantity of life, that poses more harm than benefit, or  
16 that patients who were fully informed of its potential benefits and harms would not have  
17 wanted').<sup>1 3 12</sup> Only studies will be included that have addressed overuse in Iranian health care  
18 system. Studies will be limited in English and Farsi languages. Articles will be excluded if  
19 the researchers do not have access to the full-text.  
20  
21  
22  
23  
24  
25

### 26 **Search strategy and data sources**

27  
28 An extensive search of the literature will be conducted in six databases including PubMed,  
29 Embase, Scopus, Web of Science, Cochrane and Scientific Information Database (SID) using  
30 a comprehensive search strategy to identify studies on overuse of medical services without  
31 time limit until the end of 2017, completed by reference tracking, author tracking, and expert  
32 consultation. SID is a database that categorized Iranian research- scientific journals in  
33 scientific groups and initiated its mission in August 2004 (<http://www.sid.ir/En/Journal/>). We  
34 use a combination of Medical Subject Headings (MeSH) terms and free term to maximize the  
35 sensitivity of the search. The search will be done on February 1, 2018.  
36  
37  
38  
39  
40  
41

42 Proposed search strategy (PubMed);  
43

- 44 1. Medical overuse [MeSH Term]
- 45 2. Overuse ti,ab.
- 46 3. Overmedicalization ti,ab.
- 47 4. Overtreatment\* ti,ab.
- 48 5. Overdiagnos\* ti,ab.
- 49 6. Inappropriate care ti,ab.
- 50 7. Unnecessary ti,ab.
- 51 8. Overutilization ti,ab.
- 52 9. Medicalization\* ti,ab.
- 53
- 54
- 55
- 56
- 57

10. Overmedication ti,ab.
11. Misdiagnosis ti,ab.
12. "Unwanted care" ti,ab.
13. Polypharmacy ti,ab.
14. "Inappropriate medication" ti,ab.
15. Overprescription ti,ab.
16. Value-based care ti,ab.
17. Right care ti,ab.
18. Delivery of Health Care [MeSH Term]
19. Health services [MeSH Term]
20. Medical services
21. Iran
22. 1 Or 2 Or 3 Or 4 Or 5 Or 6 Or 7 Or 8 Or 9 Or 10 Or 11 Or 12 Or 13 Or 14 Or 15 Or 16 OR 17
23. 18 OR 19 OR 20
24. 21 AND 22 AND 23

#### Study selection process and data extraction

After completing the search, the retrieved records will be imported into the EndNote software (version X8), and then the duplicate records will be deleted. Two independent reviewers will screen the articles based on the title, abstract, and full-text and extract data about authors, publication year, type of study, study population, type of service, clinical area, and overuse rate or range. All disagreements in each level of study will be noted and resolved by consensus with a third researcher.<sup>19</sup>

#### Quality appraisal

Poor quality studies can distort and affect the quality of the results.<sup>20</sup> Due to the possible wide range of included studies, we will use the JBI checklists according to the type of included studies.<sup>21</sup> The Joanna Briggs Institute (JBI) is an international institution aimed at enhancing evidence-based healthcare by providing access to health related resources. The JBI critical appraisal checklists developed and approved by JBI scientific committee. These tools are designed for various types of studies and available from <http://joannabriggs.org/research/critical-appraisal-tools.html>. Two researchers will independently appraise the quality of included studies. All potential discrepancies will be resolved through consultation with the third researcher. The risk of bias assessment will be performed based on the Cochrane Risk of Bias Tool. For this purpose items such as the

1  
2  
3 selection bias, performance bias, detection bias, attrition bias and reporting bias will be  
4 checked.<sup>22</sup>  
5

#### 6 7 **Patient and Public Involvement**

8  
9 Given that the design of the study is systematic review, the patient and or public do not  
10 involve in it.  
11

#### 12 13 **Data synthesis**

14  
15 We will categorize the results of the included studies based on publication year, clinical area,  
16 type of service (diagnostic tests, therapeutic procedures and medications) and range or rate of  
17 overuse. If the studies are homogeneous, meta-analysis will be done using quantitative data  
18 from individual studies. We will pool the data of overuse rate based on type of services.  
19 Otherwise, we use narrative method for reporting the results based on type of services and  
20 clinical areas (overuse of medication, therapeutic procedure and screening test). Also, we will  
21 report the services that have the largest number of overuse.  
22  
23  
24  
25  
26

#### 27 28 **Ethics and Dissemination**

29  
30 Like the rest of the world, there is little evidence about overuse of medical services in the  
31 Iranian health care system.<sup>23</sup> Reducing the overuse of medical services require extensive  
32 studies at the national and regional levels. We are hopeful that this systematic review will  
33 provide useful results in identifying overuse of medical services in Iranian health care system.  
34 We are hopeful that the result of this systematic review will make robust and valuable  
35 evidence for informed policy making. However, we note that we are still at the beginning of a  
36 long journey, and the need to conduct studies in this field is felt more than ever. This study  
37 was approved by Tabriz University of Medical Sciences (ethical confirmation number;  
38 IR.TBZMED.REC.1396.908).  
39  
40  
41  
42  
43  
44

#### 45 46 **Abbreviations**

47  
48 ABIM: American Board of Internal Medicine

49  
50 SID: scientific information database

51  
52 JBI: Joanna Briggs Institute  
53

#### 54 55 **Acknowledgements**

1  
2  
3 This systematic review will form part of Morteza Arab-zozani' PhD dissertation, supervised  
4 by Dr Ali Janati, Dr Mohammad Zakaria Pezeshki and Dr Rahim Khodayari-zarnagh. This  
5 work was supported by Iranian Center of Excellence in Health Management (ICEHM),  
6 School of Management and Medical Informatics, Tabriz University of Medical Sciences,  
7 Tabriz, Iran.  
8  
9  
10

## 11 **Funding**

12  
13  
14 This study approved by Tabriz University of Medical Sciences with confirmation number:  
15 5/d/633456, January 15, 2018.  
16  
17

## 18 **Contributors**

19  
20 MA and MP initiated and conceived the study. AJ and RKh participated in study design. MA  
21 drafted the research protocol. MP, AJ and RKh critically revised the content of the written  
22 protocol. All authors approved the final version of this protocol.  
23  
24  
25

## 26 **Competing interests**

27  
28 No competing interests  
29  
30  
31  
32

## 33 **References**

- 34  
35  
36 1. Elshaug AG, Rosenthal MB, Lavis JN, et al. Levers for addressing medical underuse and overuse:  
37 achieving high-value health care. *The Lancet* 2017  
38 2. Korenstein D, Smith CD. A practical framework for understanding and reducing medical overuse:  
39 Conceptualizing overuse through the patient-clinician interaction. *Journal of hospital*  
40 *medicine* 2017;12(5)  
41 3. Brownlee S, Chalkidou K, Doust J, et al. Evidence for overuse of medical services around the world.  
42 *The Lancet* 2017  
43 4. Organization WH. Monitoring the building blocks of health systems: a handbook of indicators and  
44 their measurement strategies: World Health Organization 2010.  
45 5. Korenstein D, Falk R, Howell EA, et al. Overuse of health care services in the United States: an  
46 understudied problem. *Archives of internal medicine* 2012;172(2):171-78.  
47 6. Brownlee S. Overtreated: Why too much medicine is making us sicker and poorer: Bloomsbury  
48 Publishing USA 2010.  
49 7. Kale MS, Bishop TF, Federman AD, et al. Trends in the overuse of ambulatory health care services  
50 in the United States. *JAMA internal medicine* 2013;173(2):142-48.  
51 8. Welch HG, Schwartz L, Woloshin S. Overdiagnosed: making people sick in the pursuit of health:  
52 Beacon Press 2011.  
53 9. Berwick DM. Avoiding overuse—the next quality frontier. *The Lancet* 2017  
54 10. Lipitz-Snyderman A, Bach PB. Overuse: when less is more... more or less. *JAMA internal medicine*  
55 2013;173(14):1277-78. doi: 10.1001/jamainternmed.2013.6181  
56  
57  
58  
59  
60

11. Powell AA, Bloomfield HE, Burgess DJ, et al. A conceptual framework for understanding and reducing overuse by primary care providers. *Medical Care Research and Review* 2013;70(5):451-72.
12. Saini V, Brownlee S, Elshaug AG, et al. Addressing overuse and underuse around the world. *The Lancet* 2017
13. Morgan DJ, Brownlee S, Leppin AL, et al. Setting a research agenda for medical overuse. *The BMJ* 2015;351
14. Rosenberg A, Agiro A, Gottlieb M, et al. Early trends among seven recommendations from the Choosing Wisely campaign. *JAMA internal medicine* 2015;175(12):1913-20.
15. Rumball-Smith J, Shekelle PG, Bates DW. Using the Electronic Health Record to Understand and Minimize Overuse. *Jama* 2017;317(3):257-58.
16. Keyhani S, Falk R, Bishop T, et al. The relationship between geographic variations and overuse of healthcare services: a systematic review. *Medical care* 2012;50(3):257-61.
17. Shamseer L, Moher D, Clarke M, et al. Preferred reporting items for systematic review and meta-analysis protocols (PRISMA-P) 2015: elaboration and explanation. *Bmj* 2015;349:g7647.
18. Liberati A, Altman DG, Tetzlaff J, et al. The PRISMA statement for reporting systematic reviews and meta-analyses of studies that evaluate health care interventions: explanation and elaboration. *PLoS medicine* 2009;6(7):e1000100.
19. Reviews UoYcf, Dissemination. Systematic reviews: CRD's guidance for undertaking reviews in health care: University of York, Centre for Reviews & Dissemination 2009.
20. Checklist for Systematic Reviews and Research Syntheses. *The Joanna Briggs Institute* 2017; Available from; <http://joannabriggs.org/research/critical-appraisal-tools.html>
21. Porritt K, Gomersall J, Lockwood C. JBI's systematic reviews: study selection and critical appraisal. *AJN The American Journal of Nursing* 2014;114(6):47-52.
22. Higgins JP, Altman DG, Gøtzsche PC, et al. The Cochrane Collaboration's tool for assessing risk of bias in randomised trials. *Bmj* 2011;343:d5928.
23. Arab-Zozani M. a Policy Package for Preventing Overuse and Underuse in Iranian Health System. *PhD Dissertation* 2017

Systematic Review protocol. The effects of early postnatal discharge from hospital for healthy women and term infants

**PRISMA-P 2015 Checklist: recommended items to include in a systematic review protocol**

| Section and topic                 | Item Number | Checklist item                                                                                                                                                                                  | Page number(s)   |
|-----------------------------------|-------------|-------------------------------------------------------------------------------------------------------------------------------------------------------------------------------------------------|------------------|
| <b>ADMINISTRATIVE INFORMATION</b> |             |                                                                                                                                                                                                 |                  |
| Title:                            |             |                                                                                                                                                                                                 |                  |
| Identification                    | 1a          | Identify the report as a protocol of a systematic review                                                                                                                                        | 1                |
| Update                            | 1b          | If the protocol is for an update of a previous systematic review, identify as such                                                                                                              | Not an update    |
| Registration                      | 2           | If registered, provide the name of the register (such as PROSPERO) and registration number                                                                                                      | 2 <u>and</u> 5   |
| Authors:                          |             |                                                                                                                                                                                                 |                  |
| Contact                           | 3a          | Provide name, institutional affiliation, email address of all protocol authors; provide physical mailing address of corresponding author                                                        | 1                |
| Contributions                     | 3b          | Describe contributions of protocol authors and identify the guarantor of the review                                                                                                             | <del>7</del> 8   |
| Amendments                        | 4           | If the protocol represents an amendment of a previously completed or published protocol, identify as such and list changes; otherwise, state plan for documenting important protocol amendments | Not an amendment |
| Support:                          |             |                                                                                                                                                                                                 |                  |
| Sources                           | 5a          | Indicate sources of financial or other support for the review                                                                                                                                   | <del>6</del> 8   |
| Sponsor                           | 5b          | Provide name for the review funder and/or sponsor                                                                                                                                               | <del>6</del> 8   |
| Role of sponsor or funder         | 5c          | Describe role of funder(s), sponsor(s), and/or institution(s), if any, in developing the protocol                                                                                               | <del>6</del> 8   |
| <b>INTRODUCTION</b>               |             |                                                                                                                                                                                                 |                  |
| Rationale                         | 6           | Describe the rationale for the review in the context of what is already known                                                                                                                   | 4                |
| Objectives                        | 7           | Provide an explicit statement of the question(s) the review will address with reference to participants, interventions, comparators, and outcomes (PICO)                                        | 4                |
| <b>METHODS</b>                    |             |                                                                                                                                                                                                 |                  |



## Systematic Review protocol. The effects of early postnatal discharge from hospital for healthy women and term infants

|                                    |     |                                                                                                                                                                                                                               |                      |
|------------------------------------|-----|-------------------------------------------------------------------------------------------------------------------------------------------------------------------------------------------------------------------------------|----------------------|
| Eligibility criteria               | 8   | Specify the study characteristics (such as PICO, study design, setting, time frame) and report characteristics (such as years considered, language, publication status) to be used as criteria for eligibility for the review | 5-6                  |
| Information sources                | 9   | Describe all intended information sources (such as electronic databases, contact with study authors, trials registers or other grey literature sources) with planned dates of coverage                                        | 5-6                  |
| Search strategy                    | 10  | Present draft of search strategy to be used for at least one electronic database, including planned limits, such that it could be repeated.                                                                                   | 5-6                  |
| Study records:                     |     |                                                                                                                                                                                                                               |                      |
| Data management                    | 11a | Describe the mechanism(s) that will be used to manage records and data throughout the review                                                                                                                                  | 5                    |
| Selection process                  | 11b | State the process that will be used for selecting studies (such as two independent reviewers) through each phase of the review (that is, screening, eligibility and inclusion in meta-analysis)                               | 5                    |
| Data collection process            | 11c | Describe planned method of extracting data from reports (such as piloting forms, done independently, in duplicate), any processes for obtaining and confirming data from investigators                                        | 5                    |
| Data items                         | 12  | List and define all variables for which data will be sought (such as PICO items, funding source), any pre-planned data assumptions and simplifications                                                                        | 5                    |
| Outcomes and prioritization        | 13  | List and define all outcomes for which data will be sought, including prioritization of main and additional outcomes, with rationale                                                                                          | 5                    |
| Risk of bias in individual studies | 14  | Describe anticipated methods for assessing risk of bias of individual studies, including whether this will be done at the outcome or study level., or both; state how this information will be used in data synthesis         | <del>5</del> 6 and 7 |
| Data synthesis                     | 15a | Describe criteria under which study data will be                                                                                                                                                                              | <del>5</del> 6       |

Systematic Review protocol. The effects of early postnatal discharge from hospital for healthy women and term infants

|                                   |     |                                                                                                                                                                                                                                                    |                |
|-----------------------------------|-----|----------------------------------------------------------------------------------------------------------------------------------------------------------------------------------------------------------------------------------------------------|----------------|
|                                   |     | quantitatively synthesised                                                                                                                                                                                                                         |                |
|                                   | 15b | If data are appropriate for quantitative synthesis, describe planned summary measures, methods of handling data and methods of combining data from studies, including any planned exploration of consistency (such as I <sup>2</sup> , Kendall's ) | <del>56</del>  |
|                                   | 15c | Describe any proposed additional analyses (such as sensitivity or subgroup analyses, meta-regression)                                                                                                                                              | <del>56</del>  |
|                                   | 15d | If quantitative synthesis is not appropriate, describe the type of summary planned                                                                                                                                                                 | Not applicable |
| Met-bias(es)                      | 16  | Specify any planned assessment of meta-bias(es) (such as publication bias across studies, selective reporting within studies)                                                                                                                      | <del>56</del>  |
| Confidence in cumulative evidence | 17  | Describe how the strength of the body of evidence will be assessed (such as GRADE)                                                                                                                                                                 | <del>56</del>  |

# BMJ Open

## Medical overuse in the Iranian health care system: a systematic review protocol

|                                 |                                                                                                                                                                                                                                                                                                                                                                                                                                                           |
|---------------------------------|-----------------------------------------------------------------------------------------------------------------------------------------------------------------------------------------------------------------------------------------------------------------------------------------------------------------------------------------------------------------------------------------------------------------------------------------------------------|
| Journal:                        | <i>BMJ Open</i>                                                                                                                                                                                                                                                                                                                                                                                                                                           |
| Manuscript ID                   | bmjopen-2017-020355.R2                                                                                                                                                                                                                                                                                                                                                                                                                                    |
| Article Type:                   | Protocol                                                                                                                                                                                                                                                                                                                                                                                                                                                  |
| Date Submitted by the Author:   | 10-Mar-2018                                                                                                                                                                                                                                                                                                                                                                                                                                               |
| Complete List of Authors:       | Arab-Zozani, Morteza; Tabriz University of Medical Sciences, School of Management and Medical Informatics<br>Pezeshki, Mohammad Zakaria; Tabriz University of Medical Sciences Faculty of Medicine, Department of Community Medicine<br>Khodayari-Zarnagh, Rahim; Tabriz University of Medical Sciences, School of Management and Medical Informatics<br>Janati, Ali; Tabriz University of Medical Sciences, School of Management and Medical Informatics |
| <b>Primary Subject Heading</b>: | Health policy                                                                                                                                                                                                                                                                                                                                                                                                                                             |
| Secondary Subject Heading:      | Evidence based practice, General practice / Family practice, Health services research                                                                                                                                                                                                                                                                                                                                                                     |
| Keywords:                       | Overuse, Health care system, Medical services, Health policy < HEALTH SERVICES ADMINISTRATION & MANAGEMENT, GENERAL MEDICINE (see Internal Medicine)                                                                                                                                                                                                                                                                                                      |
|                                 |                                                                                                                                                                                                                                                                                                                                                                                                                                                           |

SCHOLARONE™  
Manuscripts

## Medical overuse in the Iranian health care system: a systematic review protocol

Morteza Arab-Zozani<sup>1</sup>, Mohammad Zakaria Pezeshki<sup>2</sup>, Rahim Khodayari-Zarnagh<sup>3</sup>, Ali Janati<sup>4\*</sup>

### Authors' Affiliations

1. Iranian Center of Excellence in Health Management, Department of Health Services Management, School of Management and Medical Informatics, Tabriz University of Medical Sciences, Tabriz, Iran. Email; arab.hta@gmail.com
2. Department of Community Medicine, Faculty of Medicine, Tabriz University of Medical Sciences, Tabriz, Iran. Email; zakaria.pezeshki@gmail.com
3. Iranian Center of Excellence in Health Management, Department of Health Services Management, School of Management and Medical Informatics, Tabriz University of Medical Sciences, Tabriz, Iran. Email; rahimzarnagh@gmail.com
4. Iranian Center of Excellence in Health Management, Department of Health Services Management, School of Management and Medical Informatics, Tabriz University of Medical Sciences, Tabriz, Iran.

\*Corresponding author; Ali Janati

Address; Daneshgah Street, School of Management and Medical Informatics, Tabriz University of Medical Sciences, Tabriz, East Azerbaijan, Iran

Email; Email; janatali82@gmail.com

Tell: +98 9144195377

## Abstract

**Introduction:** Lack of resources is one of the main problems of all health care systems. Recent studies have shown that reducing the overuse of medical services plays an important role in reducing health care system costs. Overuse of medical services is a major problem in the health care system, and it threatens the quality of the services, can harm patients and create excess costs for patients. So far, few studies have been conducted in this regard in Iran. The main objective of this systematic review is to perform an inclusive search for studies that report overuse of medical services in Iranian health care system.

**Method and analysis:** An extensive search of the literature will be conducted in six databases including PubMed, Embase, Scopus, Web of Science, Cochrane and SID using a comprehensive search strategy to identify studies on overuse of medical care. The search will be done without time limit until the end of 2017, completed by reference tracking, author tracking, and expert consultation. The search will be conducted on February 1, 2018. Any study that reports an overuse in a service based on a specific standard will be included in the study. Two reviewers will screen the articles based on the title, abstract, and full-text and extract data about type of service, clinical area, and overuse rate. Quality appraisal will be assessed using the JBI checklist. Potential discrepancies will be resolved by consulting a third author.

**Ethics and Dissemination:** Recommendations will be made to the Iranian MOHME (Ministry of Health and Medical Education) in order to make better evidence-based decisions about medical services in the future.

**Registration details:** PROSPERO CRD42017075481

**Keywords:** Overuse, Medical services, Health Care System, Iran

## Article summary

### Strengths and limitations

- To our knowledge, the study will provide the first systematic review focused on overuse of medical services in Iranian health care system.
- This study could inform decision maker and physicians to distinguish the area of overuse in medical services and plan to reduce it.
- All stages of the study (screening, quality appraisal, data extraction) will be done by two researchers independently.
- The dispersion of studies in the field of overuse and the difficulty of classifying final studies is one of the possible constraints.

## Introduction

Medical overuse is often defined as the services that are more harm than benefit, does not seem to increase the quality and quantity of life, imposed excessive costs on the patient and the health care system, has low quality and if the patient has enough information, she/he will not ask for it.<sup>1-3</sup>

Based on the WHO Health Systems Framework,<sup>4</sup> overuse can delay access to four main goals of health systems- improved health, responsiveness, financial risk protection and efficiency- by increasing disadvantages and costs of medical services.<sup>5</sup> In a health system where overuse of medical services is prevalent<sup>6-8</sup> it probably does not have a high quality health service,<sup>9</sup> because according to this framework a good health service is a service which delivers effective and safe with high quality and without waste of resources.<sup>10</sup> Also, in such a system, the workforce does not function effectively because of the fear of legal follow-up.<sup>4</sup>

Over the past few years, there has been a lot of effort in identifying the overuse of medical services in the world.<sup>11-13</sup> Some of these initiatives include "Choosing Wisely", an initiative of the ABIM foundation, "Less Is More" series by JAMA Internal Medicine, "Too Much Medicine" and "Overdiagnosis" series by BMJ.<sup>14 15</sup>

As with other countries in Iran, there is little information about the amount and drivers of medical overuse in the health care system.<sup>16</sup> Also, there is no study that thoroughly examines overuse of medical services. So, the identification of overuse in medical services helps patients, practitioners, researchers, administrators and decision-makers of the health care system to manage costs, disadvantages and benefits of services and ultimately balance the use of services.

The objectives are to (1) systematically review and identify literature on the overuse of medical services; (2) identify the areas in which the overuse of medical services will take place; and (3) determine the rate of overuse of medical services in the Iranian health care system.

## Methods

### Study method

We will conduct a systematic review in accordance with the Preferred Reporting Items for Systematic Reviews and Meta-analysis (PRISMA).<sup>17</sup> We used the PRISMA because its use

would reduce the risk of flawed reporting and increase the transparency and clarity of the systematic review reports.<sup>17</sup>

The review protocol was registered in PROSPERO (registration number: CRD42017075481; [http://www.crd.york.ac.uk/PROSPERO/display\\_record.php?ID=CRD42017075481](http://www.crd.york.ac.uk/PROSPERO/display_record.php?ID=CRD42017075481)).

### **Eligibility criteria**

All published studies that investigated the overuse of medical services will be included in the study. The included studies will not be limited based on study type. Our definition of overuse will be based on Saini et al. in the recent Right Care Lancet series ('Provision of a service that is unlikely to increase the quality or quantity of life, that poses more harm than benefit, or that patients who were fully informed of its potential benefits and harms would not have wanted').<sup>13 12</sup> Only studies will be included that have addressed overuse in Iranian health care system. Studies will be limited in English and Farsi languages. Articles will be excluded if the researchers do not have access to the full-text.

### **Search strategy and data sources**

An extensive search of the literature will be conducted in six databases including PubMed, Embase, Scopus, Web of Science, Cochrane and Scientific Information Database (SID) using a comprehensive search strategy to identify studies on overuse of medical services without time limit until the end of 2017, completed by reference tracking, author tracking, and expert consultation. SID is a database that categorized Iranian research- scientific journals in scientific groups and initiated its mission in August 2004 (<http://www.sid.ir/En/Journal/>). We use a combination of Medical Subject Headings (MeSH) terms and free term to maximize the sensitivity of the search. The search will be done on February 1, 2018.

Proposed search strategy (PubMed);

1. Medical overuse [MeSH Term]
2. Overuse ti,ab.
3. Overmedicalization ti,ab.
4. Overtreatment\* ti,ab.
5. Overdiagnos\* ti,ab.
6. Inappropriate care ti,ab.
7. Unnecessary ti,ab.
8. Overutilization ti,ab.
9. Medicalization\* ti,ab.



10. Overmedication ti,ab.
11. Misdiagnosis ti,ab.
12. "Unwanted care" ti,ab.
13. Polypharmacy ti,ab.
14. "Inappropriate medication" ti,ab.
15. Overprescription ti,ab.
16. Value-based care ti,ab.
17. Right care ti,ab.
18. Delivery of Health Care [MeSH Term]
19. Health services [MeSH Term]
20. Medical services
21. Iran
22. 1 Or 2 Or 3 Or 4 Or 5 Or 6 Or 7 Or 8 Or 9 Or 10 Or 11 Or 12 Or 13 Or 14 Or 15 Or 16 OR 17
23. 18 OR 19 OR 20
24. 21 AND 22 AND 23

#### Study selection process and data extraction

After completing the search, the retrieved records will be imported into the EndNote software (version X8), and then the duplicate records will be deleted. Two independent reviewers will screen the articles based on the title, abstract, and full-text and extract data about authors, publication year, type of study, study population, type of service, clinical area, and overuse rate or range. All disagreements in each level of study will be noted and resolved by consensus with a third researcher.<sup>18</sup>

#### Quality appraisal

Poor quality studies can distort and affect the quality of the results.<sup>19</sup> Due to the possible wide range of included studies, we will use the JBI checklists according to the type of included studies.<sup>20</sup> The Joanna Briggs Institute (JBI) is an international institution aimed at enhancing evidence-based healthcare by providing access to health related resources. The JBI critical appraisal checklists developed and approved by JBI scientific committee. These tools are designed for various types of studies and available from <http://joannabriggs.org/research/critical-appraisal-tools.html>. Two researchers will independently appraise the quality of included studies. All potential discrepancies will be resolved through consultation with the third researcher. The risk of bias assessment will be performed based on the Cochrane Risk of Bias Tool. For this purpose items such as the

1  
2  
3 selection bias, performance bias, detection bias, attrition bias and reporting bias will be  
4 checked.<sup>21</sup>  
5

#### 6 7 **Patient and Public Involvement**

8  
9 Given that the design of the study is systematic review, the patient and or public do not  
10 involve in it.  
11

#### 12 13 **Data synthesis**

14  
15 We will categorize the results of the included studies based on publication year, clinical area,  
16 type of service (diagnostic tests, therapeutic procedures and medications) and range or rate of  
17 overuse. If the studies are homogeneous, meta-analysis will be done using quantitative data  
18 from individual studies. We will pool the data of overuse rate based on type of services.  
19 Otherwise, we use narrative method for reporting the results based on type of services and  
20 clinical areas (overuse of medication, therapeutic procedure and screening test). Also, we will  
21 report the services that have the largest number of overuse.  
22  
23  
24  
25  
26

#### 27 28 **Ethics and Dissemination**

29  
30 Like the rest of the world, there is little evidence about overuse of medical services in the  
31 Iranian health care system.<sup>22</sup> Reducing the overuse of medical services require extensive  
32 studies at the national and regional levels. We are hopeful that this systematic review will  
33 provide useful results in identifying overuse of medical services in Iranian health care system.  
34 We are hopeful that the result of this systematic review will make robust and valuable  
35 evidence for informed policy making. However, we note that we are still at the beginning of a  
36 long journey, and the need to conduct studies in this field is felt more than ever. This study  
37 was approved by Tabriz University of Medical Sciences (ethical confirmation number;  
38 IR.TBZMED.REC.1396.908).  
39  
40  
41  
42  
43  
44

#### 45 46 **Abbreviations**

47 ABIM: American Board of Internal Medicine

48  
49 SID: scientific information database

50  
51 JBI: Joanna Briggs Institute

#### 52 53 54 **Acknowledgements**

1  
2  
3 This systematic review will form part of Morteza Arab-zozani' PhD dissertation, supervised  
4 by Dr Ali Janati, Dr Mohammad Zakaria Pezeshki and Dr Rahim Khodayari-zarnagh. This  
5 work was supported by Iranian Center of Excellence in Health Management (ICEHM),  
6 School of Management and Medical Informatics, Tabriz University of Medical Sciences,  
7 Tabriz, Iran.  
8  
9  
10

## 11 **Funding**

12  
13  
14 This study approved by Tabriz University of Medical Sciences with confirmation number:  
15 5/d/633456, January 15, 2018.  
16  
17

## 18 **Contributors**

19  
20 MA and MP initiated and conceived the study. AJ and RKh participated in study design. MA  
21 drafted the research protocol. MP, AJ and RKh critically revised the content of the written  
22 protocol. All authors approved the final version of this protocol.  
23  
24  
25

## 26 **Competing interests**

27  
28 No competing interests  
29  
30  
31  
32

## 33 **References**

- 34  
35  
36 1. Elshaug AG, Rosenthal MB, Lavis JN, et al. Levers for addressing medical underuse and overuse:  
37 achieving high-value health care. *The Lancet* 2017  
38 2. Korenstein D, Smith CD. A practical framework for understanding and reducing medical overuse:  
39 Conceptualizing overuse through the patient-clinician interaction. *Journal of hospital*  
40 *medicine* 2017;12(5)  
41 3. Brownlee S, Chalkidou K, Doust J, et al. Evidence for overuse of medical services around the world.  
42 *The Lancet* 2017  
43 4. Organization WH. Monitoring the building blocks of health systems: a handbook of indicators and  
44 their measurement strategies: World Health Organization 2010.  
45 5. Korenstein D, Falk R, Howell EA, et al. Overuse of health care services in the United States: an  
46 understudied problem. *Archives of internal medicine* 2012;172(2):171-78.  
47 6. Brownlee S. Overtreated: Why too much medicine is making us sicker and poorer: Bloomsbury  
48 Publishing USA 2010.  
49 7. Kale MS, Bishop TF, Federman AD, et al. Trends in the overuse of ambulatory health care services  
50 in the United States. *JAMA internal medicine* 2013;173(2):142-48.  
51 8. Welch HG, Schwartz L, Woloshin S. Overdiagnosed: making people sick in the pursuit of health:  
52 Beacon Press 2011.  
53 9. Berwick DM. Avoiding overuse—the next quality frontier. *The Lancet* 2017  
54 10. Lipitz-Snyderman A, Bach PB. Overuse: when less is more... more or less. *JAMA internal medicine*  
55 2013;173(14):1277-78. doi: 10.1001/jamainternmed.2013.6181  
56  
57  
58  
59  
60

11. Powell AA, Bloomfield HE, Burgess DJ, et al. A conceptual framework for understanding and reducing overuse by primary care providers. *Medical Care Research and Review* 2013;70(5):451-72.
12. Saini V, Brownlee S, Elshaug AG, et al. Addressing overuse and underuse around the world. *The Lancet* 2017
13. Morgan DJ, Brownlee S, Leppin AL, et al. Setting a research agenda for medical overuse. *The BMJ* 2015;351
14. Rosenberg A, Agiro A, Gottlieb M, et al. Early trends among seven recommendations from the Choosing Wisely campaign. *JAMA internal medicine* 2015;175(12):1913-20.
15. Rumball-Smith J, Shekelle PG, Bates DW. Using the Electronic Health Record to Understand and Minimize Overuse. *Jama* 2017;317(3):257-58.
16. Keyhani S, Falk R, Bishop T, et al. The relationship between geographic variations and overuse of healthcare services: a systematic review. *Medical care* 2012;50(3):257-61.
17. Liberati A, Altman DG, Tetzlaff J, et al. The PRISMA statement for reporting systematic reviews and meta-analyses of studies that evaluate health care interventions: explanation and elaboration. *PLoS medicine* 2009;6(7):e1000100.
18. Reviews UoYcf, Dissemination. Systematic reviews: CRD's guidance for undertaking reviews in health care: University of York, Centre for Reviews & Dissemination 2009.
19. Checklist for Systematic Reviews and Research Syntheses. *The Joanna Briggs Institute* 2017; Available from; <http://joannabriggs.org/research/critical-appraisal-tools.html>
20. Porritt K, Gomersall J, Lockwood C. JBI's systematic reviews: study selection and critical appraisal. *AJN The American Journal of Nursing* 2014;114(6):47-52.
21. Higgins JP, Altman DG, Gøtzsche PC, et al. The Cochrane Collaboration's tool for assessing risk of bias in randomised trials. *Bmj* 2011;343:d5928.
22. Arab-Zozani M. a Policy Package for Preventing Overuse and Underuse in Iranian Health System. *PhD Dissertation* 2017

Systematic Review protocol. The effects of early postnatal discharge from hospital for healthy women and term infants

**PRISMA-P 2015 Checklist: recommended items to include in a systematic review protocol**

| Section and topic                 | Item Number | Checklist item                                                                                                                                                                                  | Page number(s)   |
|-----------------------------------|-------------|-------------------------------------------------------------------------------------------------------------------------------------------------------------------------------------------------|------------------|
| <b>ADMINISTRATIVE INFORMATION</b> |             |                                                                                                                                                                                                 |                  |
| Title:                            |             |                                                                                                                                                                                                 |                  |
| Identification                    | 1a          | Identify the report as a protocol of a systematic review                                                                                                                                        | 1                |
| Update                            | 1b          | If the protocol is for an update of a previous systematic review, identify as such                                                                                                              | Not an update    |
| Registration                      | 2           | If registered, provide the name of the register (such as PROSPERO) and registration number                                                                                                      | 2 <u>and</u> 5   |
| Authors:                          |             |                                                                                                                                                                                                 |                  |
| Contact                           | 3a          | Provide name, institutional affiliation, email address of all protocol authors; provide physical mailing address of corresponding author                                                        | 1                |
| Contributions                     | 3b          | Describe contributions of protocol authors and identify the guarantor of the review                                                                                                             | <del>7</del> 8   |
| Amendments                        | 4           | If the protocol represents an amendment of a previously completed or published protocol, identify as such and list changes; otherwise, state plan for documenting important protocol amendments | Not an amendment |
| Support:                          |             |                                                                                                                                                                                                 |                  |
| Sources                           | 5a          | Indicate sources of financial or other support for the review                                                                                                                                   | <del>6</del> 8   |
| Sponsor                           | 5b          | Provide name for the review funder and/or sponsor                                                                                                                                               | <del>6</del> 8   |
| Role of sponsor or funder         | 5c          | Describe role of funder(s), sponsor(s), and/or institution(s), if any, in developing the protocol                                                                                               | <del>6</del> 8   |
| <b>INTRODUCTION</b>               |             |                                                                                                                                                                                                 |                  |
| Rationale                         | 6           | Describe the rationale for the review in the context of what is already known                                                                                                                   | 4                |
| Objectives                        | 7           | Provide an explicit statement of the question(s) the review will address with reference to participants, interventions, comparators, and outcomes (PICO)                                        | 4                |
| <b>METHODS</b>                    |             |                                                                                                                                                                                                 |                  |

## Systematic Review protocol. The effects of early postnatal discharge from hospital for healthy women and term infants

|                                    |     |                                                                                                                                                                                                                               |                      |
|------------------------------------|-----|-------------------------------------------------------------------------------------------------------------------------------------------------------------------------------------------------------------------------------|----------------------|
| Eligibility criteria               | 8   | Specify the study characteristics (such as PICO, study design, setting, time frame) and report characteristics (such as years considered, language, publication status) to be used as criteria for eligibility for the review | 5-6                  |
| Information sources                | 9   | Describe all intended information sources (such as electronic databases, contact with study authors, trials registers or other grey literature sources) with planned dates of coverage                                        | 5-6                  |
| Search strategy                    | 10  | Present draft of search strategy to be used for at least one electronic database, including planned limits, such that it could be repeated.                                                                                   | 5-6                  |
| Study records:                     |     |                                                                                                                                                                                                                               |                      |
| Data management                    | 11a | Describe the mechanism(s) that will be used to manage records and data throughout the review                                                                                                                                  | 5                    |
| Selection process                  | 11b | State the process that will be used for selecting studies (such as two independent reviewers) through each phase of the review (that is, screening, eligibility and inclusion in meta-analysis)                               | 5                    |
| Data collection process            | 11c | Describe planned method of extracting data from reports (such as piloting forms, done independently, in duplicate), any processes for obtaining and confirming data from investigators                                        | 5                    |
| Data items                         | 12  | List and define all variables for which data will be sought (such as PICO items, funding source), any pre-planned data assumptions and simplifications                                                                        | 5                    |
| Outcomes and prioritization        | 13  | List and define all outcomes for which data will be sought, including prioritization of main and additional outcomes, with rationale                                                                                          | 5                    |
| Risk of bias in individual studies | 14  | Describe anticipated methods for assessing risk of bias of individual studies, including whether this will be done at the outcome or study level., or both; state how this information will be used in data synthesis         | <del>5</del> 6 and 7 |
| Data synthesis                     | 15a | Describe criteria under which study data will be                                                                                                                                                                              | <del>5</del> 6       |

Systematic Review protocol. The effects of early postnatal discharge from hospital for healthy women and term infants

|                                   |     |                                                                                                                                                                                                                                                    |                |
|-----------------------------------|-----|----------------------------------------------------------------------------------------------------------------------------------------------------------------------------------------------------------------------------------------------------|----------------|
|                                   |     | quantitatively synthesised                                                                                                                                                                                                                         |                |
|                                   | 15b | If data are appropriate for quantitative synthesis, describe planned summary measures, methods of handling data and methods of combining data from studies, including any planned exploration of consistency (such as I <sup>2</sup> , Kendall's ) | 56             |
|                                   | 15c | Describe any proposed additional analyses (such as sensitivity or subgroup analyses, meta-regression)                                                                                                                                              | 56             |
|                                   | 15d | If quantitative synthesis is not appropriate, describe the type of summary planned                                                                                                                                                                 | Not applicable |
| Met-bias(es)                      | 16  | Specify any planned assessment of meta-bias(es) (such as publication bias across studies, selective reporting within studies)                                                                                                                      | 56             |
| Confidence in cumulative evidence | 17  | Describe how the strength of the body of evidence will be assessed (such as GRADE)                                                                                                                                                                 | 56             |
